# Supplementary material for: Single Cell Analysis of Yeast Replicative Aging Using a New Generation of Microfluidic Device
Source: PLOS journal article supplement (doi:10.1371/journal.pone.0048275), 2012-11-08

**Fig S1a** Distribution of the number of scars for cells in an exponentially growing culture (plated on a glass slide) and those initially loaded underneath the pensile columns of different sizes. More than half of the cells initially loaded underneath the pensile columns have less than 2 bud scars.

Note: the number of scars here includes the birth scar, thus the number of bud scars = the number of scars - 1

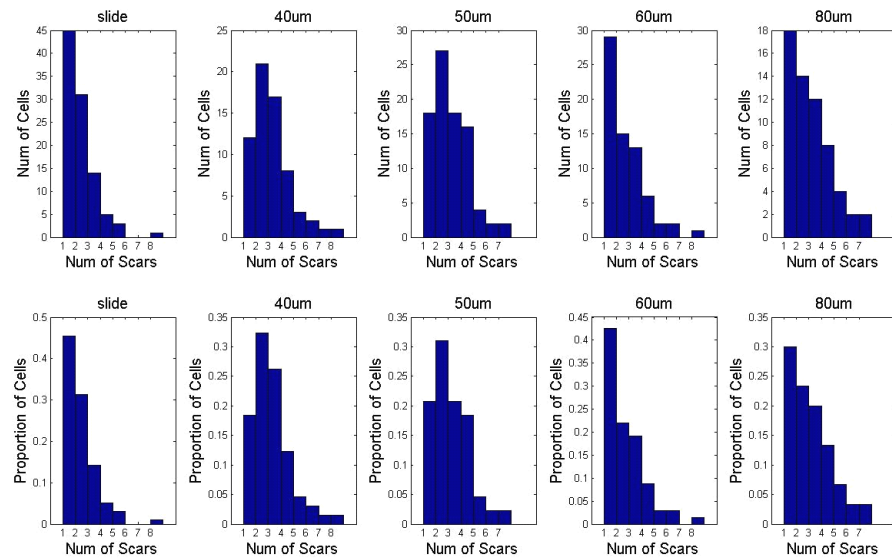

**Fig S1b** Distribution of the number of scars for cells in an exponentially growing culture and those loaded underneath the pensile columns, with data from pensile columns of different sizes combined.

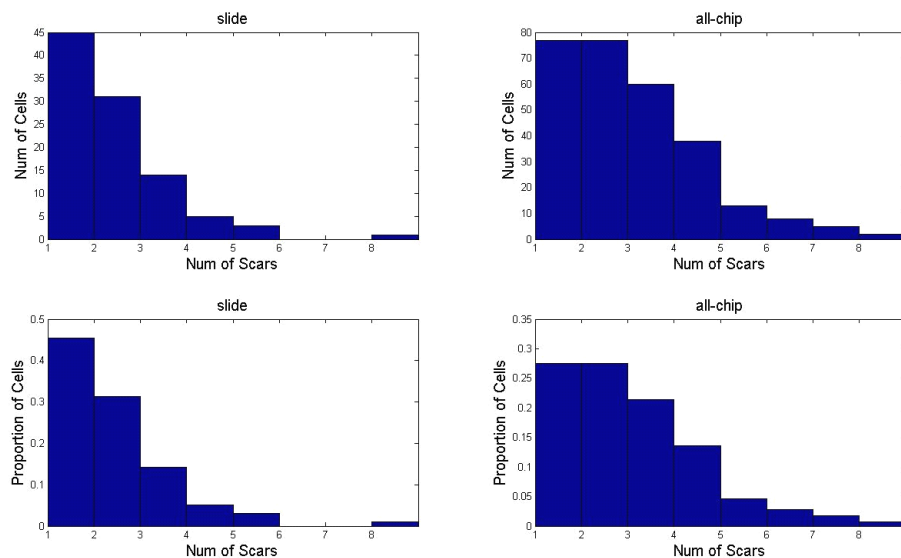

Supplement: S2 (10.1371/journal.pone.0048275.s002) [file journal.pone.0048275.s002]
