# Supplementary material for: Single Cell Analysis of Yeast Replicative Aging Using a New Generation of Microfluidic Device
Source: PLOS journal article supplement (doi:10.1371/journal.pone.0048275), 2012-11-08

**Fig S2a** Budding time interval plotted against the number of buds before death, for the *WT-MATa* and *sir2 $\Delta$ -MATa* strains. Cells were grouped by the number of buds before death and the average and standard deviation of the budding time interval are shown. The budding time interval and its variation increases dramatically in the last few cell divisions.

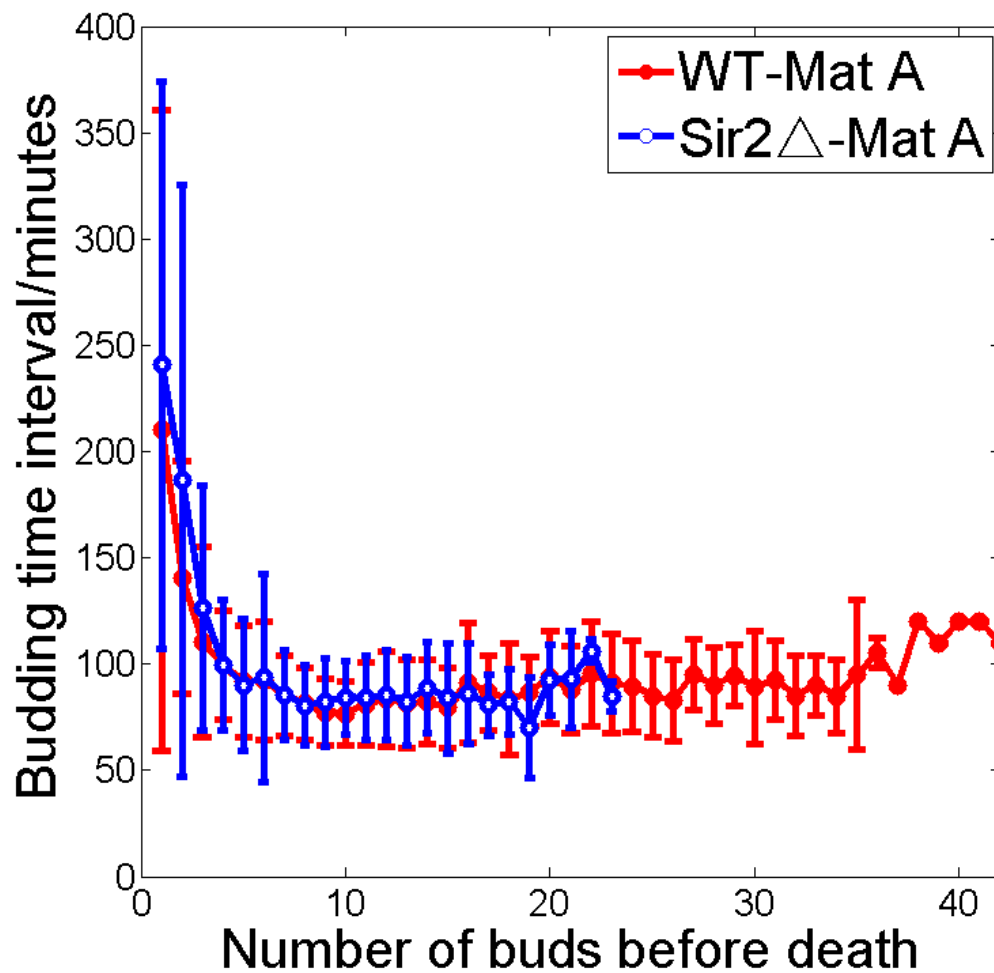

**Fig S2b** Budding time interval plotted against the number of buds before death, for the *WT-MAT $\alpha$*  and *fob1 $\Delta$ -MAT $\alpha$*  strains. See Fig. S2a for more explanation.

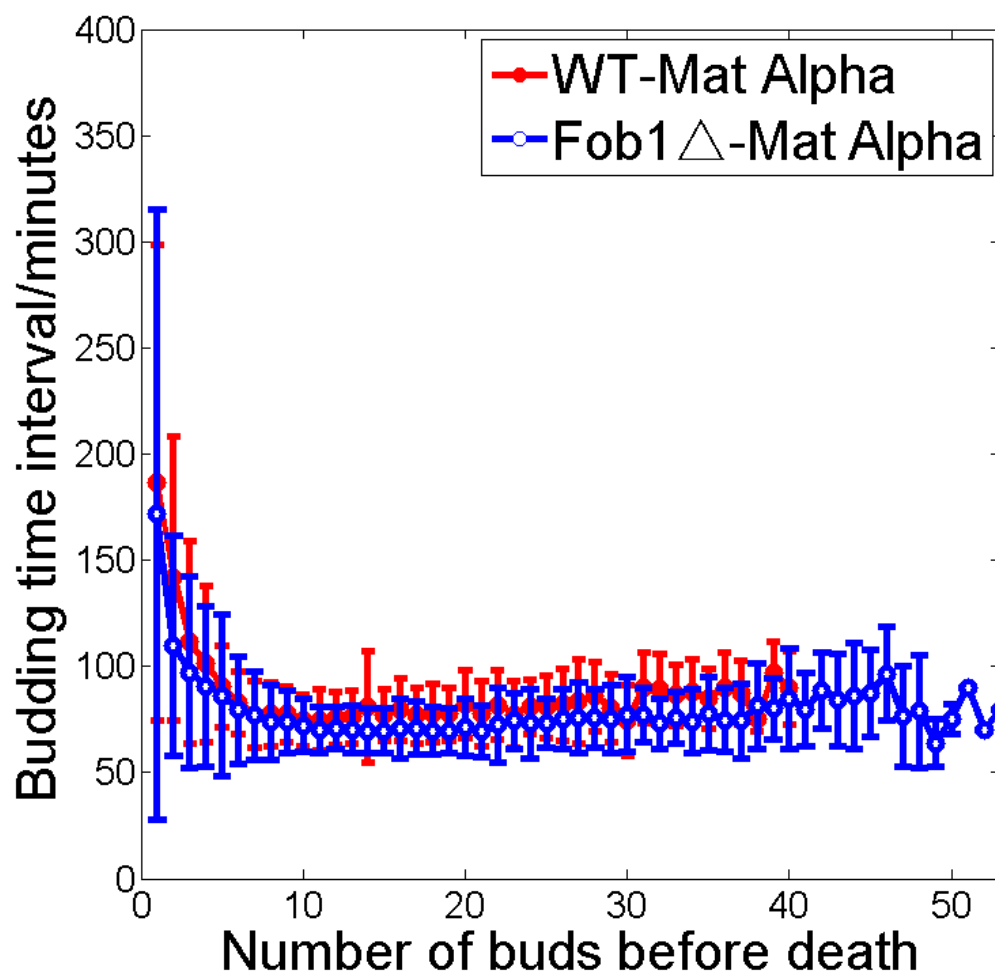

**Fig S2c** The budding time interval between the 6<sup>th</sup> and the 7<sup>th</sup> bud of the mother cell negatively correlates with the lifespan in *WT-MATa* strain. (correlation coefficient=-0.45, P value= $3.9 \times 10^{-3}$ ).

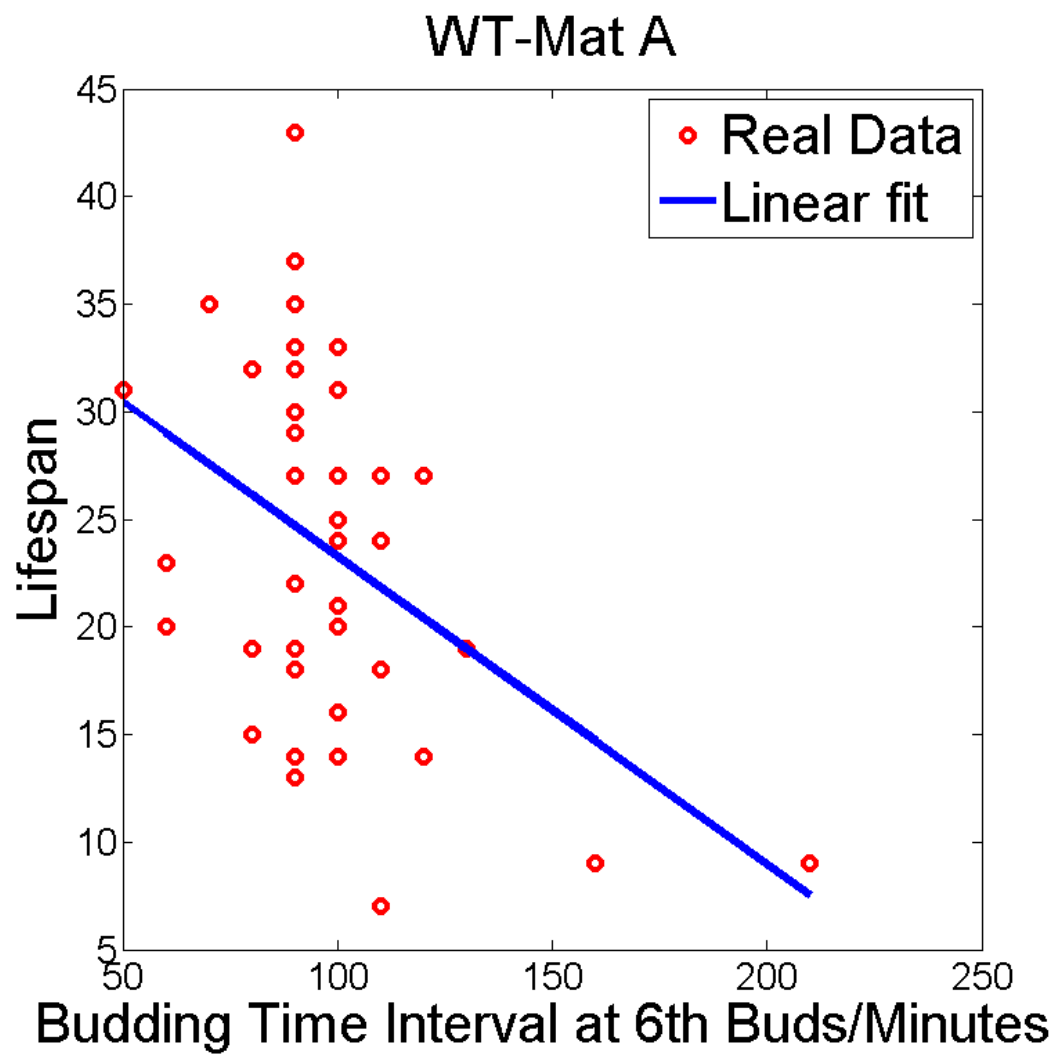

**Fig S2d** The budding time interval between 7<sup>th</sup> and 8<sup>th</sup> bud of the mother cell negatively correlates with the lifespan in *sir2Δ-MATa* strain. (correlation coefficient=-0.52, P value= $8.7 \times 10^{-5}$ ).

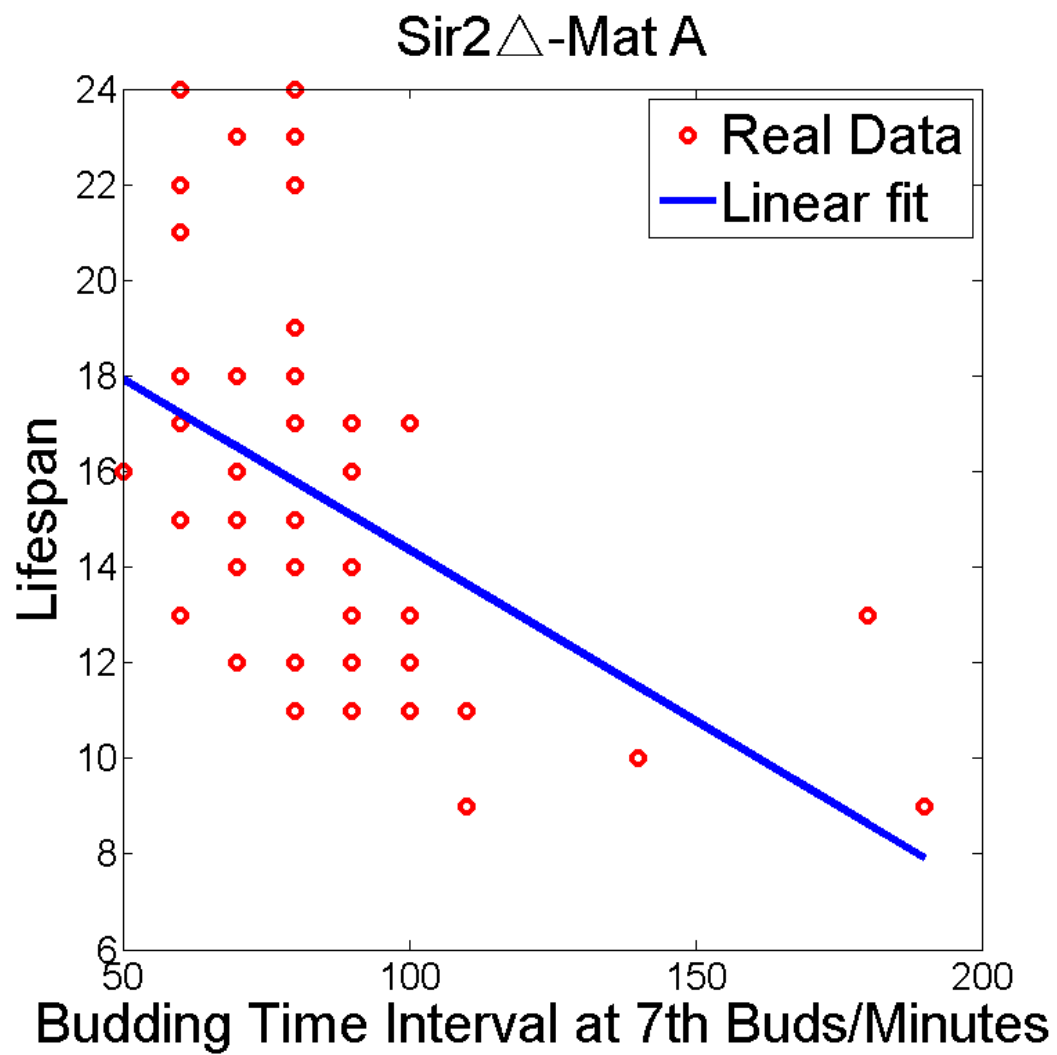

**Fig S2e** The budding time interval between 6<sup>th</sup> and 7<sup>th</sup> bud of the mother cell negatively correlates with the lifespan in *WT-MAT $\alpha$*  strain. (correlation coefficient=-0.47, P value= $1.4 \times 10^{-4}$ ).

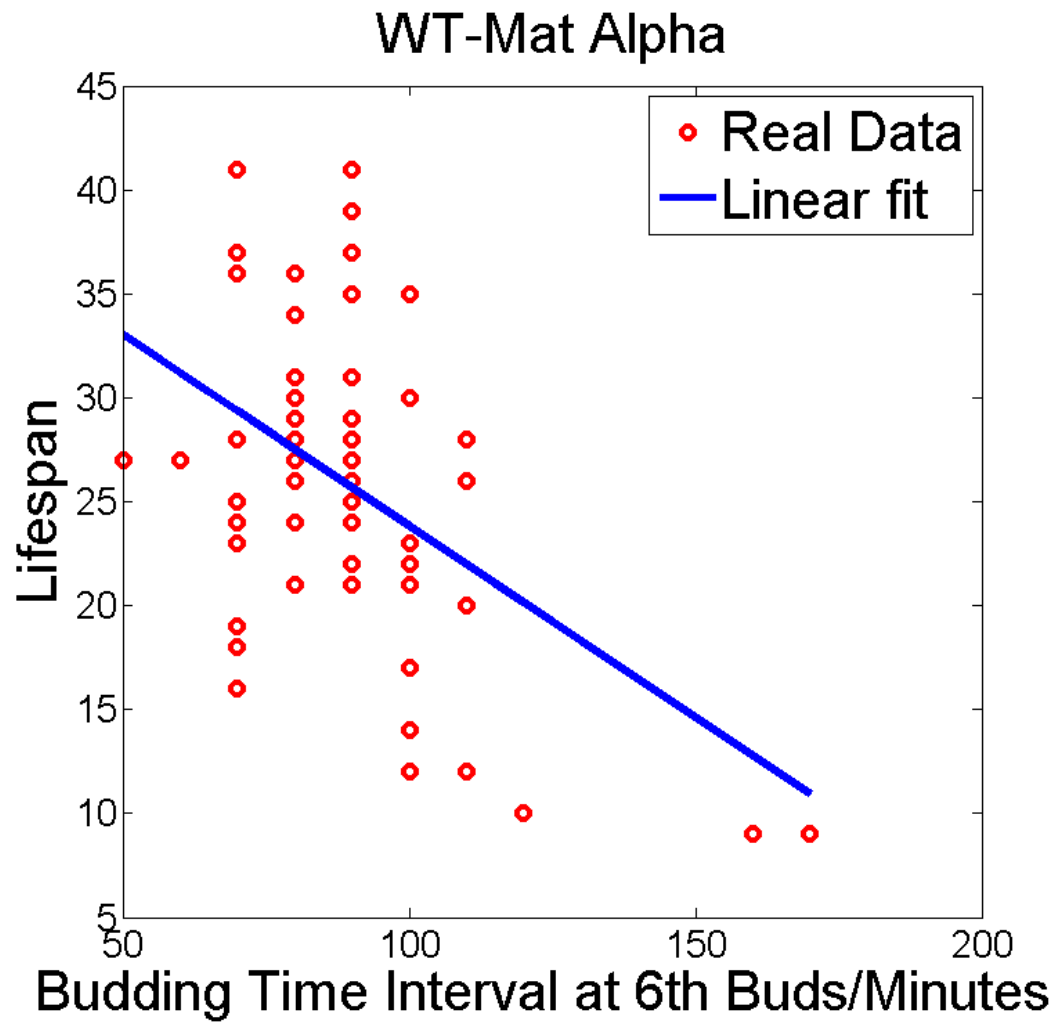

Supplement: S3 (10.1371/journal.pone.0048275.s003) [file journal.pone.0048275.s003]
